# Supplementary material
Source: PubMed Central journal article supplement (PMC6187214)
Supplement: IMM-155-346-s001.pdf [file IMM-155-346-s001.pdf]

**A.**

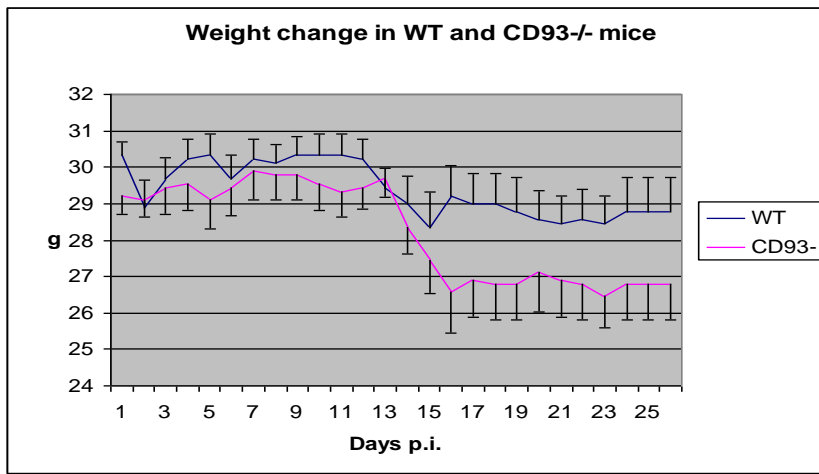

**B.**

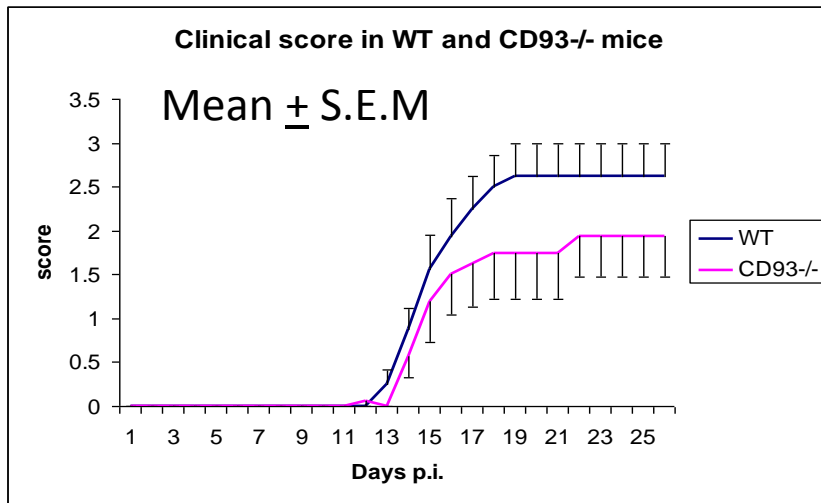

**C.**

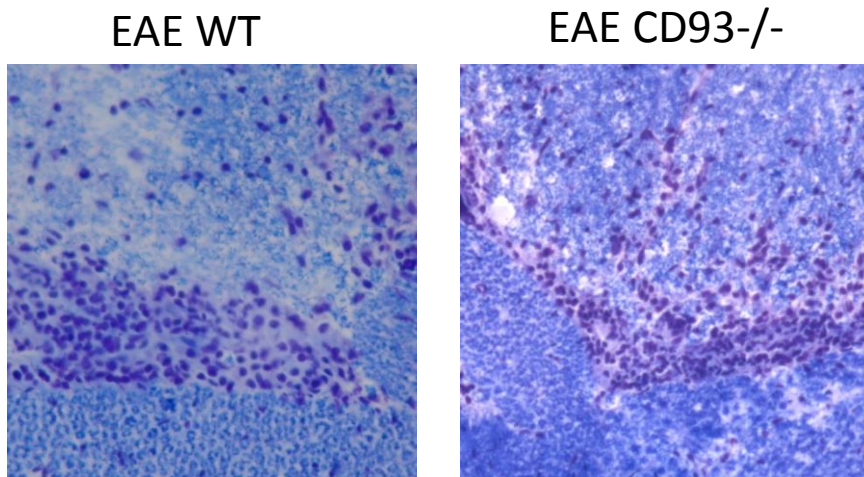

### Supplemental Figure 1

- A. Weight loss of mice over the time course of MOG-EAE (p=0,085)
- B. Clinical score of the animals (p=0,24)
- C. LFB/CV stain to assess the level of demyelination in the spinal cord
